# Supplementary material for: Paramutation-like features of multiple natural epialleles in tomato
Source: PubMed Central journal article supplement (PMC5859443; doi:10.1186/s12864-018-4590-4), 2018-03-20
Supplement: 12864_2018_4590_MOESM9_ESM.pdf [file 12864_2018_4590_MOESM9_ESM.pdf]

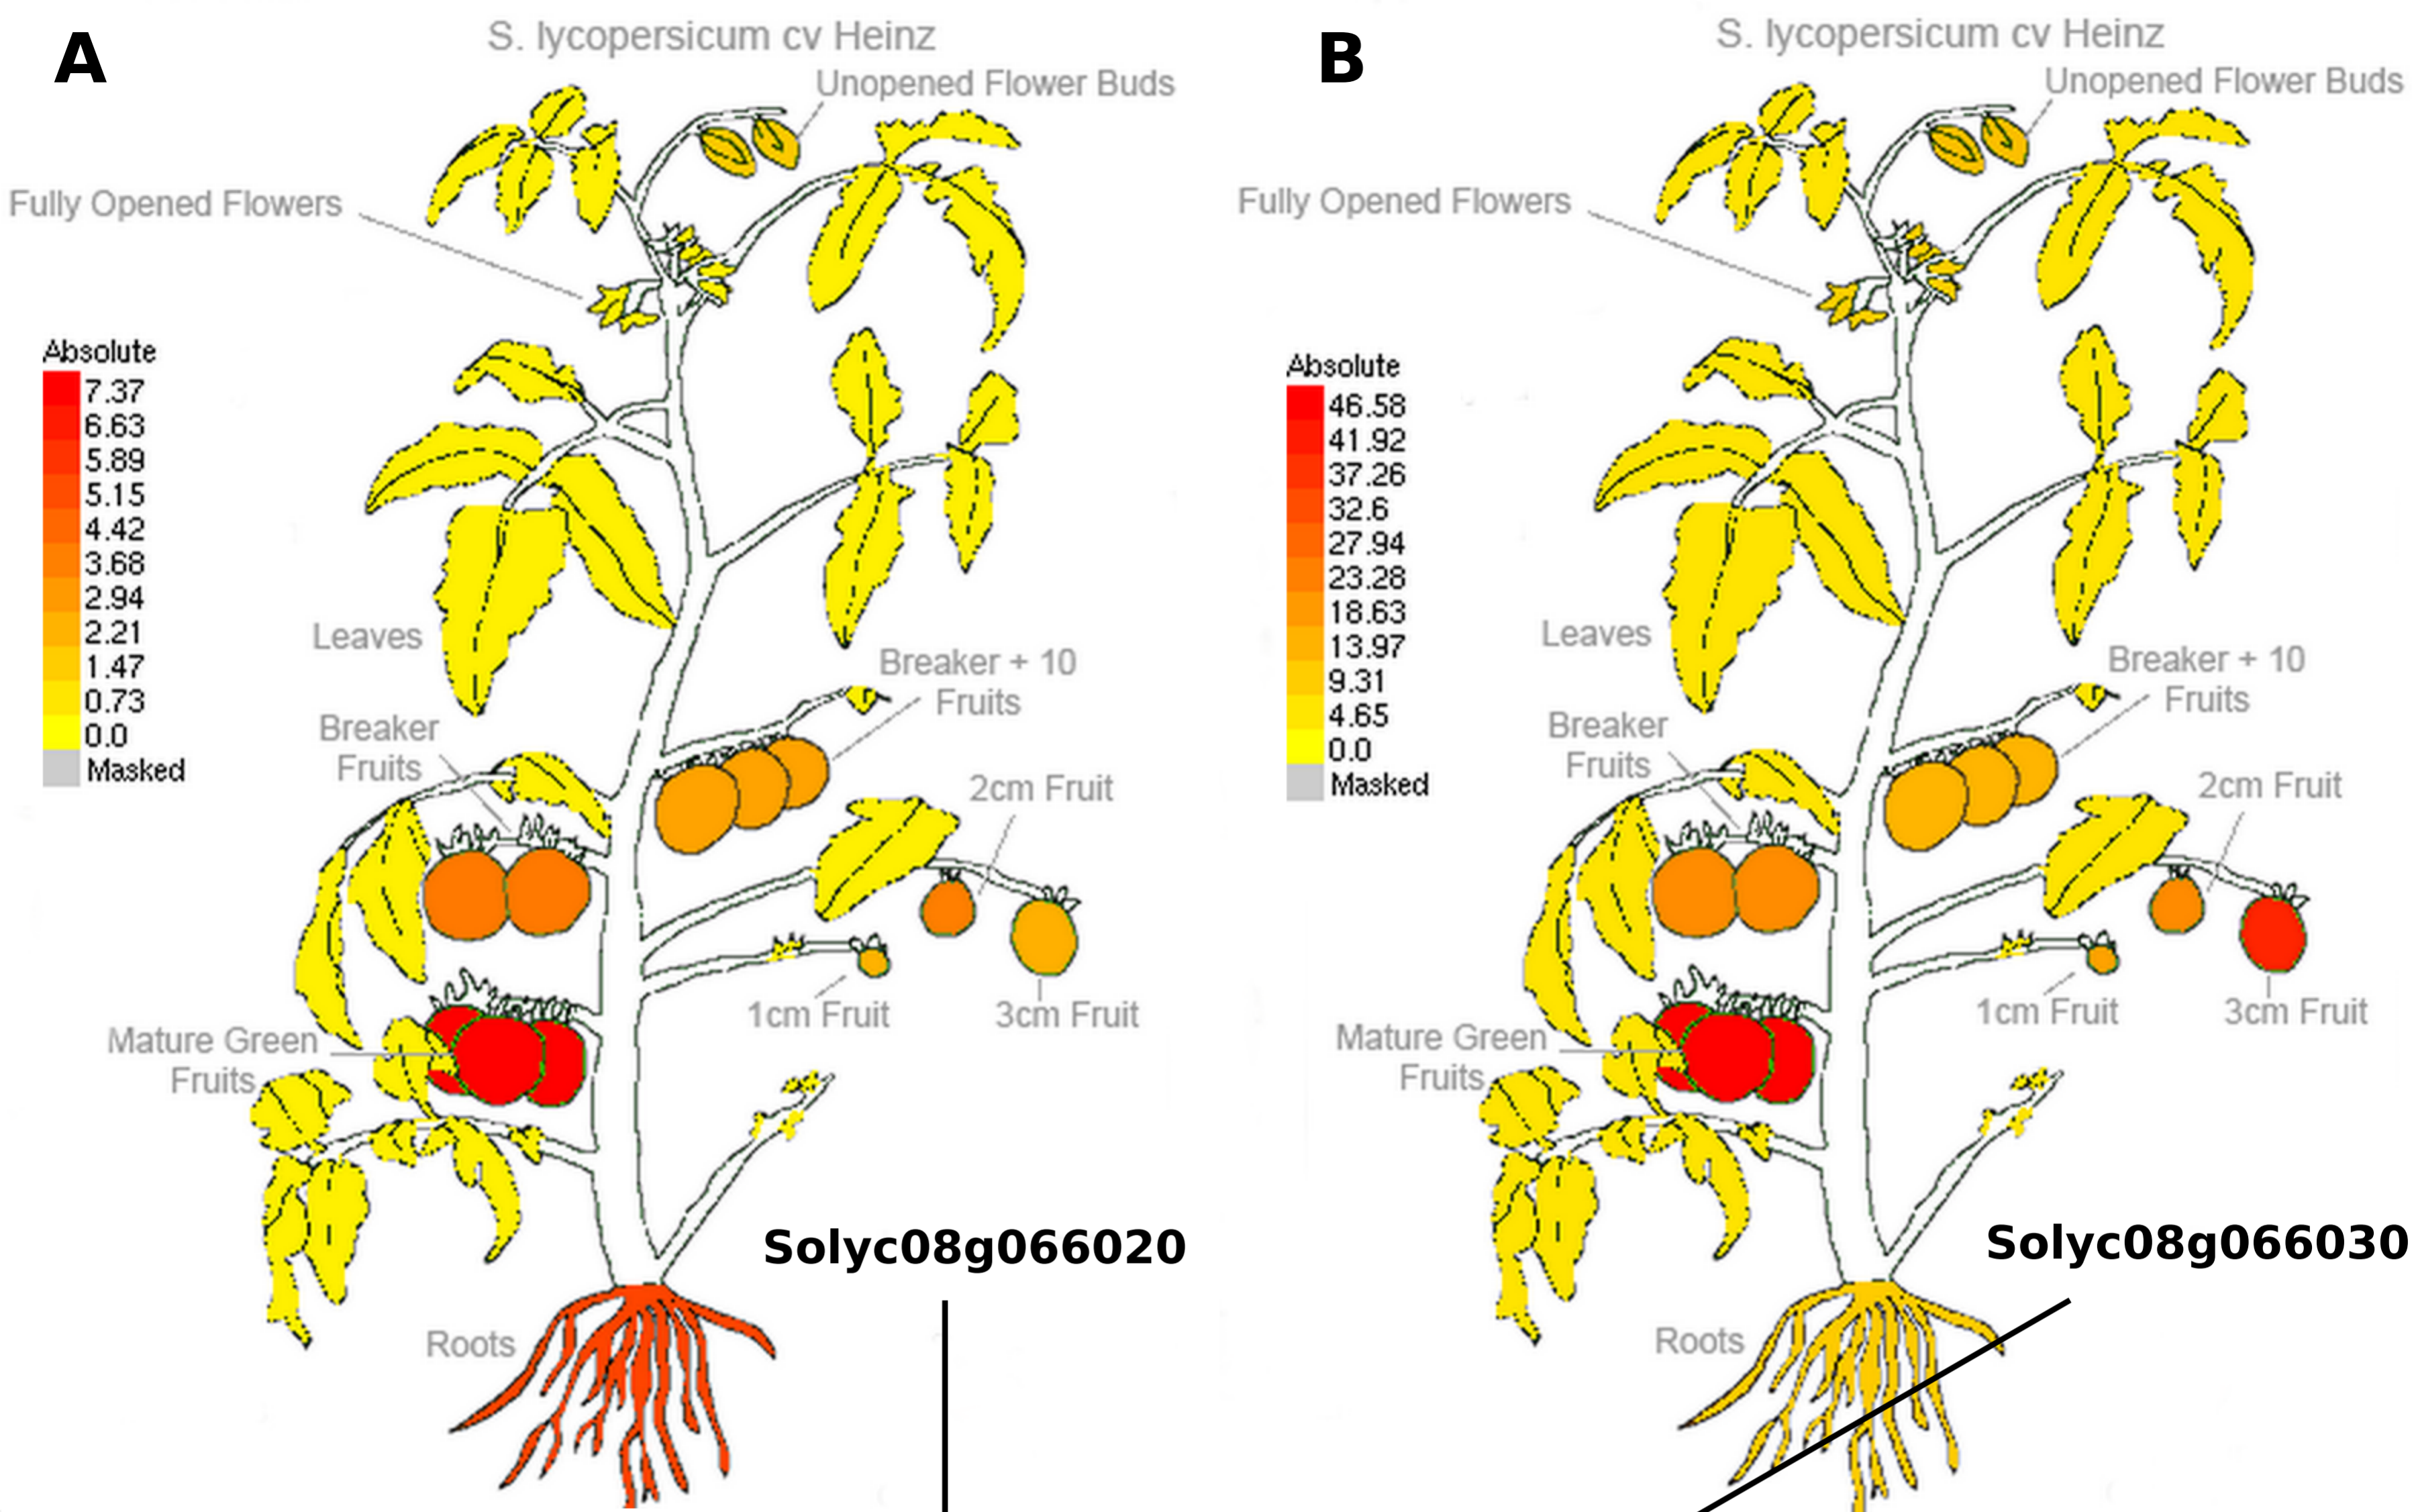

**C**

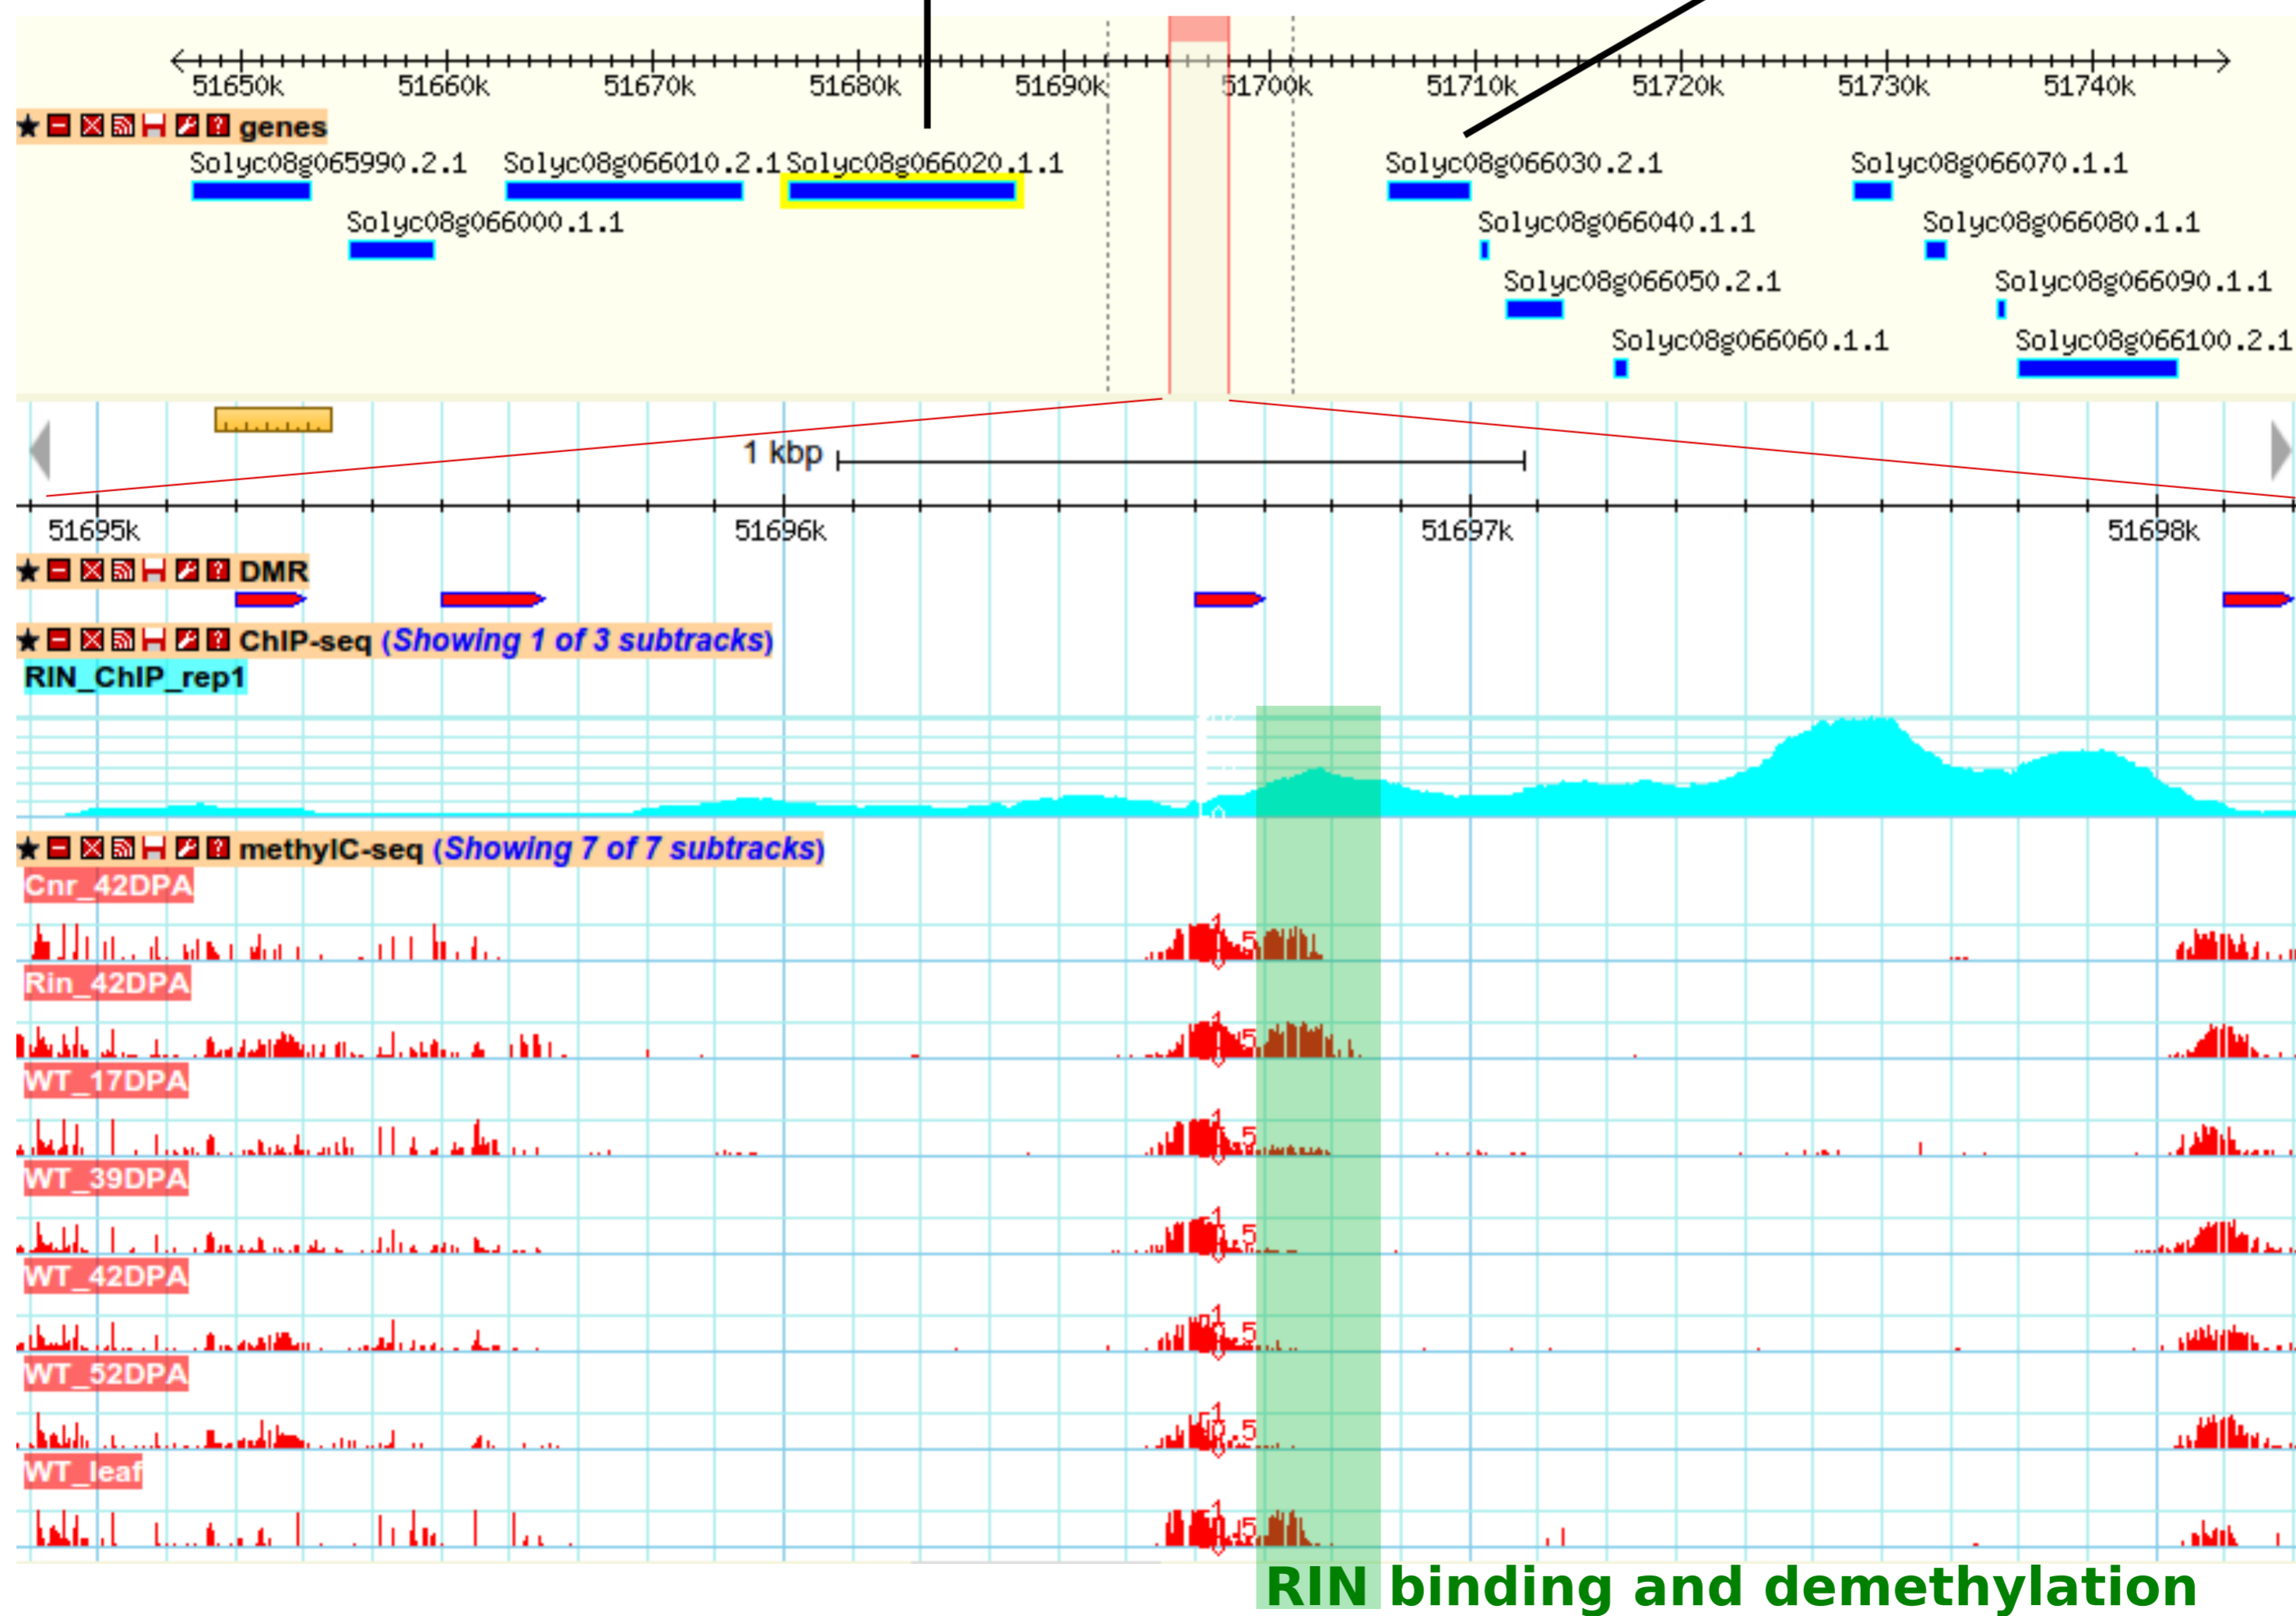

**H06**
